# Supplementary material for: Dual coexisting interconnected graphene nanostructures for high performance supercapacitor applications
Source: Royal Society of Chemistry journal article supplement (doi:10.1039/c6ee00815a), 2016-01-01
Supplement: c6ee00815a1.pdf [file c6ee00815a1.pdf]

## Supplementary information

### **Dual Coexisting Interconnected Graphene Nanostructures for High Performance Supercapacitor Applications**

Hyun-Kyung Kim, Ali Reza Kamali, Kwang Chul Roh, Kwang-Bum Kim and Derek John Fray

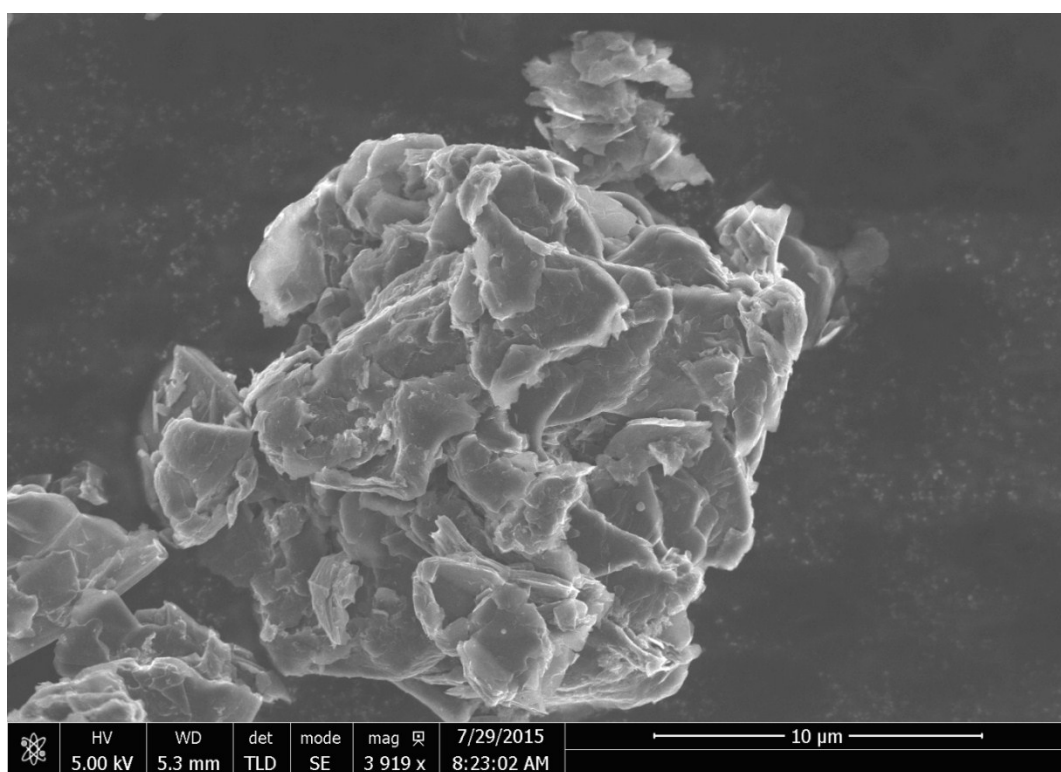

**Figure 1S.** SEM image of the as-received graphite material used as the cathode during the electrolysis process.

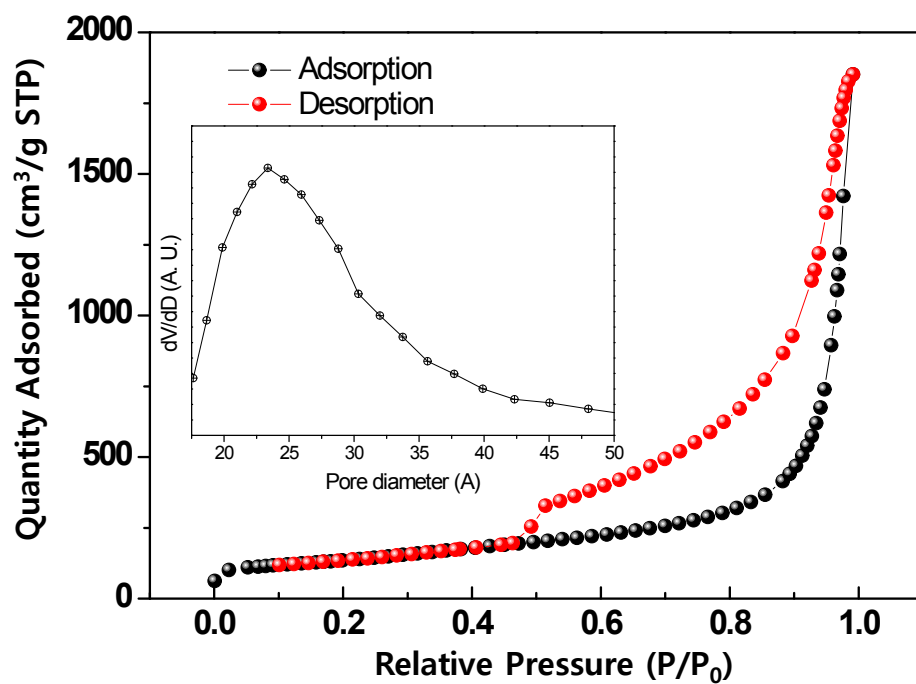

**Figure 2S.** Adsorption-desorption isotherms and pore distribution (inset) of the interconnected graphene nanosheets-nanoscrolls.

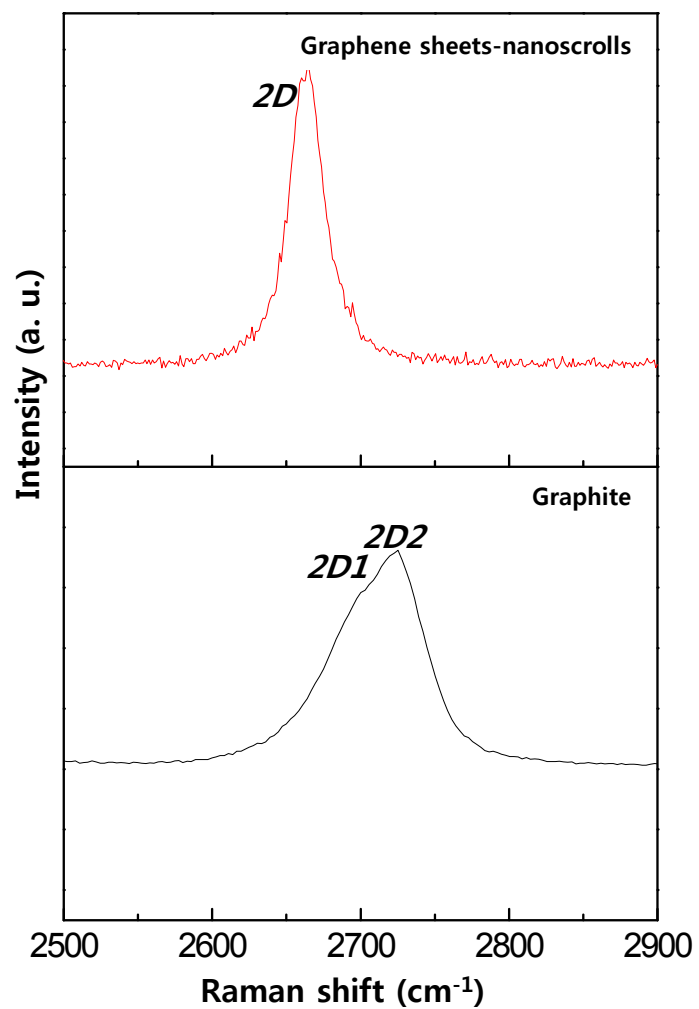

**Figure 3S.** 2D Raman spectra of natural graphite and the interconnected graphene nanosheets-nanoscrolls produced by the molten salt method.

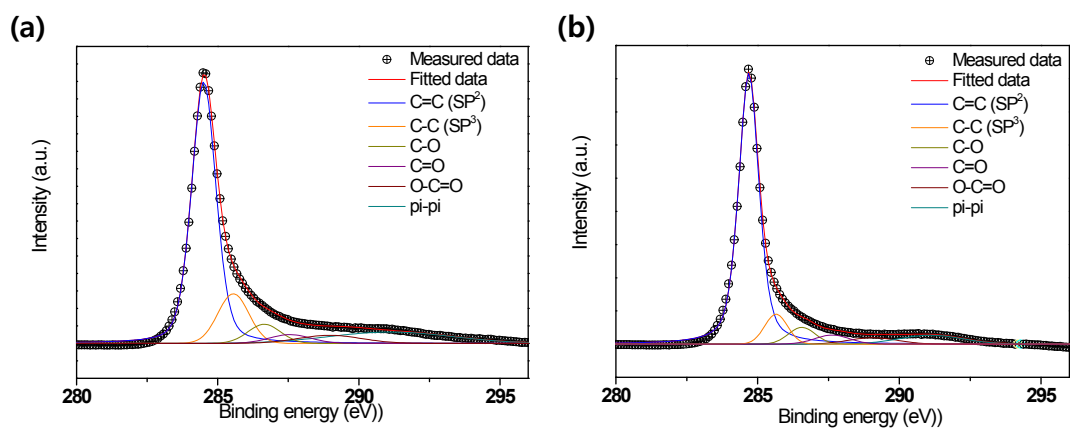

**Figure 4S.** C 1s XPS spectra of (a) interconnected graphene nanosheets-nanoscrolls electrode and (b) as-prepared graphite.

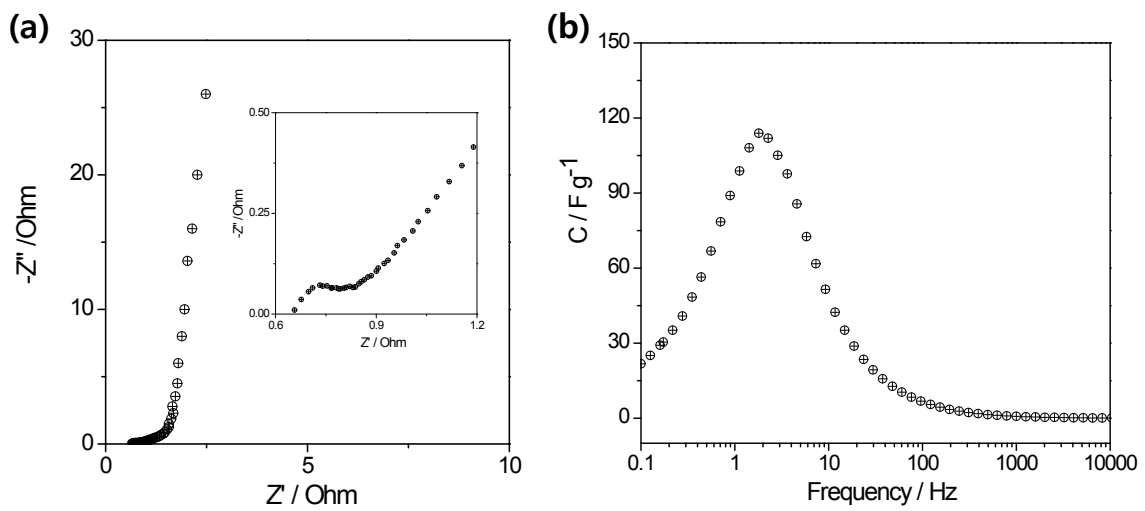

**Figure 5S.** (a) Nyquist plots and (b) Bode plots of interconnected graphene nanosheets-nanoscrolls electrode.

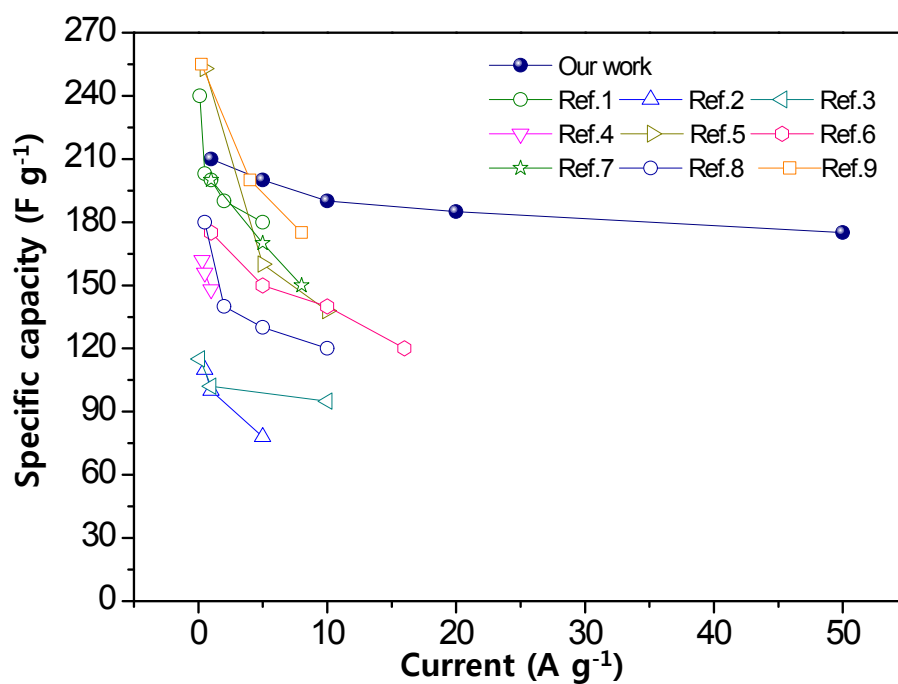

**Figure 6S.** Specific capacitances and rate capabilities of different hierarchical carbon nanostructures. The graphene-based material reported here is compared with those produced in organic solvents (refs. 1, 2, 3,4) and aqueous solvents (refs. 5, 6, 7, 8, 9).

**Table 1S.** Comparison of the electrochemical performance of different hierarchical carbon nanostructures.

| Electrode material                              | Test method                                               | Electrochemical performances<br>( $C_{\text{single-electrode}}$ ) | Ref.                                   |
|-------------------------------------------------|-----------------------------------------------------------|-------------------------------------------------------------------|----------------------------------------|
| Porous graphene-based monolithic carbon         | 2-electrode cell<br>(1 M TEABF <sub>4</sub> /ACN)         | 238 F/g at 0.1 A/g<br>~180 F/g at 15 A/g                          | 1<br>(Y. Tao <i>et al.</i> )           |
| Graphene/ carbon Nanotube                       | 2-electrode cell<br>(1 M TEABF <sub>4</sub> /ACN)         | 109.7 F/g at 0.5 A/g<br>78.3 F/g at 5 A/g                         | 2<br>(N. Jung <i>et al.</i> )          |
| Hierarchically Porous Graphite Particles        | 3-electrode cell<br>(1 M TEABF <sub>4</sub> /PC)          | 115 F/g at 0.1 A/g<br>95 F/g at 10 A/g                            | 3<br>(Z. Chen <i>et al.</i> )          |
| Hollow mesoporous carbon capsules               | 2-electrode cell<br>(1 M TEABF <sub>4</sub> /ACN)         | 162 F/g at 0.3 A/g<br>148 F/g at 1 A/g                            | 4<br>(D. Bhattacharjya <i>et al.</i> ) |
| Graphene/ Polypyrrole Nanotube                  | 3-electrode cell<br>(1 M H <sub>2</sub> SO <sub>4</sub> ) | 253 F/g at 0.5 A/g<br>138 F/g at 10 A/g                           | 5<br>(S. Ye <i>et al.</i> )            |
| Graphene/ carbon Nanotube                       | 3-electrode cell<br>(1 M H <sub>2</sub> SO <sub>4</sub> ) | 187 F/g at 0.5 A/g<br>135 F/g at 16 A/g                           | 6<br>(H. Youn <i>et al.</i> )          |
| Corrugated graphene                             | 2-electrode cell<br>(6 M KOH)                             | 203 F/g at 0.2 A/g<br>~ 150 F/g at 8 A/g                          | 7<br>(A. M. Abdelkader <i>et al.</i> ) |
| Edge sulfonated graphite                        | 3-electrode cell<br>(6 M KOH)                             | 180 F/g at 0.5 A/g<br>130 F/g at 1 A/g                            | 8<br>(P. Wen <i>et al.</i> )           |
| Corrugated graphene                             | 2-electrode cell<br>(6 M KOH)                             | 255 F/g at 0.25 A/g<br>~ 175 F/g at 8 A/g                         | 9<br>(A. M. Abdelkader <i>et al.</i> ) |
| <b><u>Graphene nanosheets - nanoscrolls</u></b> | <b>2-electrode cell<br/>(1 M TEABF<sub>4</sub>/ACN)</b>   | <b><u>213 F/g at 1 A/g</u></b><br><b><u>185 F/g at 50 A/g</u></b> | <b><u>This work</u></b>                |

## References

- [1] Y. Tao, X. Xie, W. Lv, D-M. Tang, D. Kong, Z. Huang, H. Nishihara, T. Ishii, B. Li, D. Golberg, F. Kang, T. Kyotani and Q-H. Yang, *Sci. Rep.*, 2013, **3**, 2975.
- [2] N. Jung, S. Kwon, D. Lee, D-M. Yoon, Y. M. Park, A. Benayad, J-Y. Choi and J. S. Park, *Adv. Mater.*, 2013, **25**, 6854–6858.
- [3] Z. Chen, J. Wen, C. Yan, L. Rice, H. Sohn, M. Shen, M. Cai, B. Dunn and Y. Lu, *Adv. Energy Mater.*, 2011, **1**, 551–556.
- [4] D. Bhattacharjya, M-S. Kim, T-S. Bae and J-S. Yu, *J. Power Sources*, 2013, **244**, 799–805.
- [5] S. Ye and J. Feng, *ACS Appl. Mater. Interfaces*, 2014, **6**, 9671–9679.
- [6] H-C. Youn, S-M. Bak, S-H. Park, S-B. Yoon, K. C. Roh and K-B. Kim, *Met. Mater. Int.*, 2014, **20** (5), 975–981.
- [7] A. M. Abdelkader, C. Valle's, A. J. Cooper, I. A. Kinloch and R. A. W. Dryfe, *ACS Nano*, 2014, **8** (11), 11225–11233.
- [8] P. Wen, P. Gong, Y. Mi, J. Wang and S. Yang, *RSC Adv.*, 2014, **4**, 35914–35918.
- [9] A. M. Abdelkader, *J. Mater. Chem. A*, 2015, **3**, 8519–8525.
